# Supplementary material
Source: PubMed Central journal article supplement (PMC7850143)
Supplement: supp_8.3.E506_2020-0004-1-at.pdf [file supp_8.3.E506_2020-0004-1-at.pdf]

## Appendix 1 (as supplied by the authors)

### Appendix 1: Supplementary material

**Table S1: Listing of the site names, research ethics board names and registration numbers for the 19 CAPTURE registry study sites across Canada**

| Site name                                                               | Region         | Research ethics board name                     | Registration number | City Size  |
|-------------------------------------------------------------------------|----------------|------------------------------------------------|---------------------|------------|
| Capital City Women's Center, Edmonton, Alberta                          | Western Canada | Health Research Ethics Board – Health Panel    | Pro00063537         | >= 400,000 |
| Centre Gynecologie et Maternité, LaSalle, Québec                        | Quebec         | IRB Institutional Review Board Services        | Pro00012844         | < 400,000  |
| CHU de Québec, Université Laval, Québec City                            | Quebec         | Comité d'éthique de la recherche CHU de Québec | R-00-768            | >= 400,000 |
| Clinique de Gynécologie & Obstétrique Pierre Boucher, Longueuil, Québec | Quebec         | IRB Institutional Review Board Services        | Pro00012844         | < 400,000  |

|                                                                                                                             |                    |                                                                                         |             |                           |
|-----------------------------------------------------------------------------------------------------------------------------|--------------------|-----------------------------------------------------------------------------------------|-------------|---------------------------|
| Complexe Medical<br>Saint Laurant – Dr.<br>Robert Sabbah Inc.,<br>Saint-Laurent, Québec                                     | Quebec             | IRB Institutional<br>Review Board<br>Services                                           | Pro00012844 | <<br><br><br><br>400,000  |
| Department of<br>Obstetrics and<br>Gynaecology, St.<br>Michael’s Hospital,<br>Toronto, Ontario                              | Central<br>Ontario | St. Michael’s Hospital<br>Research Ethics<br>Office                                     | 15-286      | >=<br><br><br><br>400,000 |
| Department of<br>Obstetrics and<br>Gynecology, BC<br>Women’s Hospital &<br>Health Centre,<br>Vancouver, British<br>Columbia | Western<br>Canada  | University of British<br>Columbia Children’s<br>and Women’s<br>Research Ethics<br>Board | H15-03372   | >=<br><br><br><br>400,000 |
| Department of<br>Obstetrics and<br>Gynecology, Mount<br>Sinai Hospital,<br>Toronto, Ontario                                 | Central<br>Ontario | Mount Sinai Hospital<br>Research Ethics<br>Board                                        | 15-0206-E   | >=<br><br><br><br>400,000 |

|                                                            |                    |                                                                                                                 |                           |    |         |
|------------------------------------------------------------|--------------------|-----------------------------------------------------------------------------------------------------------------|---------------------------|----|---------|
| Dr. Barry Sanders,<br>Inc., Vancouver,<br>British Columbia | Western<br>Canada  | IRB Institutional<br>Review Board<br>Services                                                                   | Pro00012844               | >= | 400,000 |
| Hamilton Health<br>Sciences, Hamilton,<br>Ontario          |                    | Hamilton Integrated<br>Research Ethics<br>Board                                                                 | 0620                      | >= | 400,000 |
| IWK Health Centre,<br>Halifax, Nova Scotia                 | Eastern<br>Canada  | IWK Research Ethics<br>Board (IWK-REB)                                                                          | 1021698                   | >= | 400,000 |
| Kingston General<br>Hospital, Kingston,<br>Ontario         | Eastern<br>Ontario | Queen's University<br>Health Sciences &<br>Affiliated Teaching<br>Hospitals Research<br>Ethics Board<br>(HSREB) | 6021528                   | <  | 400,000 |
| Ottawa Hospital<br>Research Institute,<br>Ottawa, Ontario  | Eastern<br>Ontario | Ottawa Health<br>Science Network<br>Research Ethics<br>Board                                                    | 20150671-<br>01H          | >= | 400,000 |
| Regina Medical<br>Centre, Regina,<br>Saskatchewan          | Western<br>Canada  | University of<br>Saskatchewan<br>Research Ethics<br>Office                                                      | Bio 16-87 /<br>RQHR 16-26 |    |         |

|                                                                                                    |                    |                                                                 |                                       |
|----------------------------------------------------------------------------------------------------|--------------------|-----------------------------------------------------------------|---------------------------------------|
| Southern Health<br>Centre, White Rock,<br>British Columbia                                         | Western<br>Canada  | IRB Institutional<br>Review Board<br>Services                   | Pro00012844                           |
| South Windsor<br>Women's Health,<br>Windsor, Ontario                                               | Western<br>Ontario | IRB Institutional<br>Review Board<br>Services                   | Pro00012844                           |
| Strand Clinic, St.<br>John's, Newfoundland                                                         | Eastern<br>Canada  | Newfoundland and<br>Labrador Health<br>Research Ethics<br>Board | File#<br>20170665<br>Ref#<br>2016.228 |
| The Fertility Clinic,<br>Victoria Hospital<br>London Health<br>Sciences Centre,<br>London, Ontario | Western<br>Ontario | IRB Institutional<br>Review Board<br>Services                   | Pro00012844                           |
| University of Calgary,<br>Calgary, Alberta                                                         | Western<br>Canada  | Conjoint Health<br>Research Ethics<br>Board                     | REB 16-0547                           |

---
