# Supplementary material
Source: PubMed Central journal article supplement (PMC7850143)
Supplement: supp_8.3.E506_2020-0004-Original-submission.pdf [file supp_8.3.E506_2020-0004-Original-submission.pdf]

1  
2  
3 **Variability in the quality of ultrasound reporting for uterine fibroids**  
4  
5  
6 **in Canada: results from a prospective cohort registry**  
7  
8

9 Olga Bougie MD MPH, Mohamed A. Bedaiwy MD PhD, Philippe Laberge MD  
10  
11 ACGE, Gerald Lebovic PhD, Nicholas Leyland MD MHCM, Mostafa Atri MD,  
12  
13 Ally Murji MD MPH, on behalf of the CAPTURE Steering Committee  
14  
15

16  
17 **Affiliations:** Department of Obstetrics and Gynaecology, Queen's University,  
18  
19 Kingston, Ontario (Bougie), Department of Obstetrics and Gynecology, The  
20  
21 University of British Columbia, Vancouver, British Columbia (Bedaiwy), Department  
22  
23 of Obstetrics and Gynecology, CHU de Québec, Laval University, Québec City,  
24  
25 Québec (Laberge), Applied Health Research Centre, LKSKI, St. Michael's Hospital,  
26  
27 Toronto, Ontario (Lebovic), Department of Obstetrics and Gynecology, McMaster  
28  
29 University, Hamilton, Ontario (Leyland), Department of Medical Imaging, University  
30  
31 of Toronto, Toronto, Ontario (Atri), Department of Obstetrics and Gynecology,  
32  
33 Mount Sinai Hospital, University of Toronto, Toronto, Ontario (Murji), Canada  
34  
35  
36  
37  
38  
39  
40  
41

42 **Correspondence to:** Olga Bougie, Department of Obstetrics and Gynaecology,  
43  
44 Queen's University, Victory 4, 76 Stuart St., Kingston, Ontario, K7L 2V7, Canada.  
45  
46 Tel.: 613-548-7840; fax: 613-548-1330; e-mail: olga.bougie@kingstonhsc.ca  
47  
48  
49

50 **Funding:** Sponsored by Allergan Inc., Markham, Canada. Editorial assistance was  
51  
52 provided to the authors by Natalie Prior, PhD, of Complete HealthVizion and funded  
53  
54 by Allergan plc, Dublin, Ireland. All authors met the ICMJE authorship criteria.  
55  
56  
57 Neither honoraria nor payments were made for authorship.  
58  
59  
60

1  
2  
3 **Competing interests:** Olga Bougie has presented continuing medical education  
4 events sponsored by Allergan Canada, Bayer, Hologic and AbbVie. Mohamed A.  
5 Bedaiwy is a member of advisory boards for AbbVie and Allergan. Philippe Laberge  
6 is the Chair of the CAPTURE study and a consultant for Allergan, AbbVie, Hologic,  
7 Medtronic, Minerva and Olympus. Gerald Lebovic has no conflicts to declare.  
8 Nicholas Leyland has received research support from Allergan and AbbVie. Mostafa  
9 Atri has no conflicts to declare. Ally Murji is a member of Speaker Bureaus and  
10 advisory boards for AbbVie, Allergan, Bayer and Hologic.  
11  
12  
13  
14  
15  
16  
17  
18  
19  
20  
21  
22  
23  
24  
25  
26  
27  
28  
29  
30  
31  
32  
33  
34  
35  
36  
37  
38  
39  
40  
41  
42  
43  
44  
45  
46  
47  
48  
49  
50  
51  
52  
53  
54  
55  
56  
57  
58  
59  
60

Confidential

## ABSTRACT

**BACKGROUND:** Uterine fibroids are common in women and their management is heavily influenced by information gathered through imaging. We aimed to evaluate the type of imaging performed for fibroids in Canada.

**METHODS:** Pre-menopausal women with symptomatic fibroids were enrolled in a prospective, non-interventional, observational registry at 19 Canadian sites (CAPTURE). Clinical characteristics were extracted from the baseline visit. Ultrasound reporting quality criteria were evaluated using the Morphological Uterus Sonographic Assessment guideline.

**RESULTS:** Of 1493 women, 1148 had ultrasound, 135 had magnetic resonance imaging (MRI), 80 had other imaging types and 130 did not have imaging reported at the baseline visit. After adjusting for demographic and clinical characteristics, patients who received MRI had larger fibroids (OR per 1-cm increase 1.11; 95% CI 1.05–1.17) and more numerous fibroids (1 v. > 1) (OR 1.74; 95% CI 1.14–2.64) compared to those with ultrasound only. For ultrasound reporting, quality criteria were met by 268/1148 (23.3%) reports. There was a difference in the quality of reporting between the 19 sites ( $p < 0.0001$ ). Logistic regression model accounting for within-site variability showed that ultrasounds in the province of Québec were less likely to meet all quality criteria (OR 0.20; 95% CI 0.06–0.66) and those from sites in more populated cities ( $\geq 400,000$  inhabitants) were more likely to do so (OR 6.15; 95% CI 2.20–17.18).

1  
2  
3 **INTERPRETATION:** Imaging modality for fibroids is associated with patient  
4  
5 characteristics. The quality of fibroid ultrasound reporting in Canada falls short of  
6  
7 internationally endorsed guidelines and needs improvement.  
8  
9

10  
11  
12  
13  
14 **Trial registration:** ClinicalTrials.gov: NCT02580578.  
15  
16

17 **Keywords:** magnetic resonance imaging; ultrasonography; ultrasound; uterine  
18  
19 fibroids  
20  
21  
22

23  
24  
25  
26  
27  
28  
29  
30  
31  
32  
33  
34  
35  
36  
37  
38  
39  
40  
41  
42  
43  
44  
45  
46  
47  
48  
49  
50  
51  
52  
53  
54  
55  
56  
57  
58  
59  
60

Confidential

## Introduction

Uterine fibroids are benign smooth muscle tumors with a prevalence of up to 70–80% in women by the age of 50 years.<sup>1</sup> Approximately half of women with uterine fibroids will experience symptoms of abnormal uterine bleeding, pressure and reproductive issues.<sup>1</sup> Although ultrasound is the mainstay for the diagnosis and monitoring of uterine fibroids, magnetic resonance imaging (MRI) can also be used.<sup>2</sup> There are no clinical practice guidelines to help determine when an MRI should be ordered and many fibroid guidelines de-emphasize the role of MRI.<sup>3</sup> Nonetheless, the decision to order MRI is often based on patient and provider characteristics, and likely to be dependent on the practice setting. Little is known about the real-world choices for fibroid-imaging modalities. Regardless of the choice of modality, it is essential that imaging provides the clinician with details on fibroid characteristics to help guide the management approach. Hence, the quality of imaging may be even more important than the modality itself. In 2015, the International Society of Ultrasound in Obstetrics and Gynecology endorsed the Morphological Uterus Sonographic Assessment (MUSA) consensus statement, which described the sonographic features and terminology for reporting on uterine fibroids.<sup>4</sup> This document called for standardized reporting to reduce the variability in the evaluation of fibroids. The goal of systematic standardization was to improve the quality of reporting and thereby optimize clinical management of this condition. The uptake of this guideline in clinical settings has not been previously evaluated.

A prospective, non-interventional, multi-site, observational registry of premenopausal women with symptomatic uterine fibroids (CAPTURE) was established in Canada in 2015. This registry provides an opportunity to describe practice patterns

1  
2  
3 in the diagnosis and management of fibroids across diverse geographic and practice  
4 settings. The study had 2 objectives: 1) describe factors associated with the use of  
5 MRI to evaluate uterine fibroids; 2) evaluate the quality of, and variation in,  
6 ultrasound reporting within the Canadian health-care system.  
7  
8  
9  
10  
11  
12

## 13 **Methods**

14  
15  
16  
17 The CAPTURE registry comprised a cohort of women with uterine fibroids from  
18 19 study sites across Canada (ClinicalTrials.gov: NCT02580578). The registry  
19 methods have been previously published.<sup>5</sup> The study sites represented all regions in  
20 Canada and were a mix of academic and community centers. This was a non-  
21 interventional study in which physicians were not required to perform any medical  
22 procedure that was outside their routine clinical practice. All investigations were  
23 ordered at the physicians' discretion and performed/interpreted at various clinical  
24 practice locations based on provider and patient preference. Approval was obtained  
25 from research ethics boards at each participating study site (see Table S1 in  
26 Appendix). Included in the registry were pre-menopausal female patients aged  
27  $\geq 18$  years with symptoms associated with uterine fibroids who were being observed  
28 (watchful waiting), currently being treated or initiating treatment (drug intervention,  
29 procedure intervention or a combination of both). Patients were required to provide  
30 written, informed consent prior to or at the initial study visit. Exclusion criteria  
31 included known or suspected significant pelvic pathology not associated with uterine  
32 fibroids and patients undergoing an emergency hysterectomy at initial visit.  
33  
34  
35  
36  
37  
38  
39  
40  
41  
42  
43  
44  
45  
46  
47  
48  
49  
50  
51  
52  
53  
54  
55  
56  
57  
58  
59  
60  
61  
62  
63  
64  
65  
66  
67  
68  
69  
70  
71  
72  
73  
74  
75  
76  
77  
78  
79  
80  
81  
82  
83  
84  
85  
86  
87  
88  
89  
90  
91  
92  
93  
94  
95  
96  
97  
98  
99  
100  
101  
102  
103  
104  
105  
106  
107  
108  
109  
110  
111  
112  
113  
114  
115  
116  
117  
118  
119  
120  
121  
122  
123  
124  
125  
126  
127  
128  
129  
130  
131  
132  
133  
134  
135  
136  
137  
138  
139  
140  
141  
142  
143  
144  
145  
146  
147  
148  
149  
150  
151  
152  
153  
154  
155  
156  
157  
158  
159  
160  
161  
162  
163  
164  
165  
166  
167  
168  
169  
170  
171  
172  
173  
174  
175  
176  
177  
178  
179  
180  
181  
182  
183  
184  
185  
186  
187  
188  
189  
190  
191  
192  
193  
194  
195  
196  
197  
198  
199  
200  
201  
202  
203  
204  
205  
206  
207  
208  
209  
210  
211  
212  
213  
214  
215  
216  
217  
218  
219  
220  
221  
222  
223  
224  
225  
226  
227  
228  
229  
230  
231  
232  
233  
234  
235  
236  
237  
238  
239  
240  
241  
242  
243  
244  
245  
246  
247  
248  
249  
250  
251  
252  
253  
254  
255  
256  
257  
258  
259  
260  
261  
262  
263  
264  
265  
266  
267  
268  
269  
270  
271  
272  
273  
274  
275  
276  
277  
278  
279  
280  
281  
282  
283  
284  
285  
286  
287  
288  
289  
290  
291  
292  
293  
294  
295  
296  
297  
298  
299  
300  
301  
302  
303  
304  
305  
306  
307  
308  
309  
310  
311  
312  
313  
314  
315  
316  
317  
318  
319  
320  
321  
322  
323  
324  
325  
326  
327  
328  
329  
330  
331  
332  
333  
334  
335  
336  
337  
338  
339  
340  
341  
342  
343  
344  
345  
346  
347  
348  
349  
350  
351  
352  
353  
354  
355  
356  
357  
358  
359  
360  
361  
362  
363  
364  
365  
366  
367  
368  
369  
370  
371  
372  
373  
374  
375  
376  
377  
378  
379  
380  
381  
382  
383  
384  
385  
386  
387  
388  
389  
390  
391  
392  
393  
394  
395  
396  
397  
398  
399  
400  
401  
402  
403  
404  
405  
406  
407  
408  
409  
410  
411  
412  
413  
414  
415  
416  
417  
418  
419  
420  
421  
422  
423  
424  
425  
426  
427  
428  
429  
430  
431  
432  
433  
434  
435  
436  
437  
438  
439  
440  
441  
442  
443  
444  
445  
446  
447  
448  
449  
450  
451  
452  
453  
454  
455  
456  
457  
458  
459  
460  
461  
462  
463  
464  
465  
466  
467  
468  
469  
470  
471  
472  
473  
474  
475  
476  
477  
478  
479  
480  
481  
482  
483  
484  
485  
486  
487  
488  
489  
490  
491  
492  
493  
494  
495  
496  
497  
498  
499  
500  
501  
502  
503  
504  
505  
506  
507  
508  
509  
510  
511  
512  
513  
514  
515  
516  
517  
518  
519  
520  
521  
522  
523  
524  
525  
526  
527  
528  
529  
530  
531  
532  
533  
534  
535  
536  
537  
538  
539  
540  
541  
542  
543  
544  
545  
546  
547  
548  
549  
550  
551  
552  
553  
554  
555  
556  
557  
558  
559  
560  
561  
562  
563  
564  
565  
566  
567  
568  
569  
570  
571  
572  
573  
574  
575  
576  
577  
578  
579  
580  
581  
582  
583  
584  
585  
586  
587  
588  
589  
590  
591  
592  
593  
594  
595  
596  
597  
598  
599  
600  
601  
602  
603  
604  
605  
606  
607  
608  
609  
610  
611  
612  
613  
614  
615  
616  
617  
618  
619  
620  
621  
622  
623  
624  
625  
626  
627  
628  
629  
630  
631  
632  
633  
634  
635  
636  
637  
638  
639  
640  
641  
642  
643  
644  
645  
646  
647  
648  
649  
650  
651  
652  
653  
654  
655  
656  
657  
658  
659  
660  
661  
662  
663  
664  
665  
666  
667  
668  
669  
670  
671  
672  
673  
674  
675  
676  
677  
678  
679  
680  
681  
682  
683  
684  
685  
686  
687  
688  
689  
690  
691  
692  
693  
694  
695  
696  
697  
698  
699  
700  
701  
702  
703  
704  
705  
706  
707  
708  
709  
710  
711  
712  
713  
714  
715  
716  
717  
718  
719  
720  
721  
722  
723  
724  
725  
726  
727  
728  
729  
730  
731  
732  
733  
734  
735  
736  
737  
738  
739  
740  
741  
742  
743  
744  
745  
746  
747  
748  
749  
750  
751  
752  
753  
754  
755  
756  
757  
758  
759  
760  
761  
762  
763  
764  
765  
766  
767  
768  
769  
770  
771  
772  
773  
774  
775  
776  
777  
778  
779  
780  
781  
782  
783  
784  
785  
786  
787  
788  
789  
790  
791  
792  
793  
794  
795  
796  
797  
798  
799  
800  
801  
802  
803  
804  
805  
806  
807  
808  
809  
810  
811  
812  
813  
814  
815  
816  
817  
818  
819  
820  
821  
822  
823  
824  
825  
826  
827  
828  
829  
830  
831  
832  
833  
834  
835  
836  
837  
838  
839  
840  
841  
842  
843  
844  
845  
846  
847  
848  
849  
850  
851  
852  
853  
854  
855  
856  
857  
858  
859  
860  
861  
862  
863  
864  
865  
866  
867  
868  
869  
870  
871  
872  
873  
874  
875  
876  
877  
878  
879  
880  
881  
882  
883  
884  
885  
886  
887  
888  
889  
890  
891  
892  
893  
894  
895  
896  
897  
898  
899  
900  
901  
902  
903  
904  
905  
906  
907  
908  
909  
910  
911  
912  
913  
914  
915  
916  
917  
918  
919  
920  
921  
922  
923  
924  
925  
926  
927  
928  
929  
930  
931  
932  
933  
934  
935  
936  
937  
938  
939  
940  
941  
942  
943  
944  
945  
946  
947  
948  
949  
950  
951  
952  
953  
954  
955  
956  
957  
958  
959  
960  
961  
962  
963  
964  
965  
966  
967  
968  
969  
970  
971  
972  
973  
974  
975  
976  
977  
978  
979  
980  
981  
982  
983  
984  
985  
986  
987  
988  
989  
990  
991  
992  
993  
994  
995  
996  
997  
998  
999  
1000

1  
2  
3 registry. Patients who had MRI or other imaging may have also undergone  
4  
5 ultrasound. Furthermore, patient demographic information, medical history and  
6  
7 evaluation of past and current symptomatology were extracted. Baseline measures  
8  
9 of patient-reported outcomes were extracted using the Uterine Fibroid Symptom  
10  
11 and Health-Related Quality of Life questionnaire<sup>6,7</sup> and the Aberdeen Menorrhagia  
12  
13 Severity Scale (AMSS) (Ruta score) bleeding score.<sup>8</sup> Characteristics of the  
14  
15 medical practice in which the patient was seen were also recorded, including  
16  
17 geographic region within Canada (Western Ontario, Central Ontario, Eastern  
18  
19 Ontario, Québec, Western Canada), academic versus community practice and city  
20  
21 size based on population (small city is < 400,000 inhabitants). Data were recorded  
22  
23 in the Research Electronic Data CAPTURE database. Data quality assurance  
24  
25 included real-time flagging of missing data, flagging of values outside pre-  
26  
27 established ranges and quarterly site visits by central research teams to ensure  
28  
29 accuracy of data entry for each patient chart.  
30  
31  
32  
33  
34  
35

### 36 **Ultrasound reporting quality criteria**

37  
38  
39 Each ultrasound report was assigned a quality rating based on 5 criteria that were  
40  
41 adapted from the MUSA consensus statement, as described below.  
42  
43  
44

- 45 1. Fibroid number – If the report mentioned a specific number of fibroids, it  
46 met the quality standard. If it reported “multiple” or “unspecified” number  
47 of fibroids, then it did not meet the quality standard.  
48  
49
- 50 2. Fibroid dimensions – If all 3 dimensions of the largest fibroid were  
51 reported, the report met the quality standard.  
52  
53  
54  
55  
56  
57  
58  
59  
60

- 1
- 2
- 3 3. Uterine dimensions – If all 3 uterine dimensions or a uterine volume were
- 4 reported, the report met the quality standard.
- 5
- 6
- 7
- 8
- 9 4. Fibroid type – A report describing any of the following for the largest
- 10 fibroid met the quality standard: submucosal (International Federation of
- 11 Gynecology and Obstetrics type 0, 1, 2, unknown type), intramural,
- 12 subserosal, cervical, pedunculated.
- 13
- 14
- 15
- 16
- 17
- 18
- 19 5. Fibroid location – A report describing any of the following for the largest
- 20 fibroid location met the quality standard: anterior, lateral, posterior, fundal.
- 21
- 22
- 23

24 An ultrasound report was considered to be of high quality if it met all 5 quality  
25 standards.  
26

### 27 **Statistical analysis**

28  
29  
30  
31  
32  
33 Descriptive analyses of demographic and clinical variables of interest were conducted.  
34  
35 Continuous data were summarized using mean and standard deviation or median and  
36 interquartile range. Categorical variables were summarized using counts and  
37 percentage. Chi-square tests or Fisher exact tests, as appropriate, were used to test for  
38 unadjusted differences in categorical variables between imaging groups. Parametric  
39 or non-parametric *t*-tests, as appropriate, were used to test for unadjusted differences  
40 in continuous variables between imaging groups. Unadjusted and adjusted logistic  
41 regression models examined the association between demographic and clinical  
42 variables of interest with regard to imaging type. A generalized linear mixed model  
43 was used to examine associations between hypothesis-generating covariates and the  
44 outcome of having a quality ultrasound. This model adjusted for the following  
45 characteristics: age; body mass index (BMI); ethnicity; gravidity (any v. none);  
46  
47  
48  
49  
50  
51  
52  
53  
54  
55  
56  
57  
58  
59  
60



1  
2  
3 history of infertility (yes, no, unknown); previous medical or surgery intervention;  
4  
5 geographic region; community versus academic center; city population size. A  
6  
7 random effect was placed in the model to account for correlation arising within  
8  
9 clinical site. The median odds ratio (OR), a measure of heterogeneity that is adjusted  
10  
11 for patient-level covariates, was computed from the adjusted model.<sup>9</sup>  
12  
13  
14

## 15 16 **Results**

17  
18  
19 The study included 1493 women from across 19 practice sites in Canada. For 1148  
20  
21 (76.9%) women, ultrasound was the only imaging modality recorded. At baseline  
22  
23 visit, an MRI report was available for 135 (9.0%) women, 80 (5.4%) had another  
24  
25 imaging modality and 130 (8.7%) did not have imaging reported. Of the 130 women  
26  
27 without imaging reported at baseline, 104 (80%) did have imaging diagnosis of  
28  
29 fibroids that was performed more than 12 months before the baseline visit. These  
30  
31 130 women were excluded from further analysis. Baseline characteristics of women  
32  
33 who had ultrasound only and MRI are shown in Table 1.  
34  
35  
36

37  
38  
39 After adjusting for demographic and clinical characteristics, patients with MRI were  
40  
41 more likely to have larger fibroids (OR per 1-cm increase in fibroid diameter 1.11;  
42  
43 95% confidence interval [CI] 1.05–1.17) and more numerous fibroids (OR of 1 v.  
44  
45 > 1 fibroid 1.74; 95% CI 1.14–2.64) compared to those with ultrasound only. Older  
46  
47 patients were less likely to have an MRI (OR per 5-year age increase 0.73; 95% CI  
48  
49 0.64–0.84). Patients having MRI reported lower menstrual bleeding scores (OR for  
50  
51 10-point increase in AMSS score 0.89; 95% CI 0.81–0.98). There was no difference  
52  
53 in the odds of having an MRI based on BMI (OR per 1-unit increase in BMI 1.01;  
54  
55 95% CI 0.98–1.04), gravidity (> 0 v. 0) (OR 0.89; 95% CI 0.58–1.35), infertility (OR  
56  
57 1.17; 95% CI 0.75–1.83) or ethnicity/race ( $p = 0.02$ ).  
58  
59  
60

1  
2  
3 The quality of ultrasound reporting is shown in Table 2. Overall, 268 (23.3%)  
4 ultrasound reports met all 5 quality criteria. Four quality criteria were met by 365  
5 (31.8%) reports, 3 quality criteria were met by 326 (28.4%) and 2 quality criteria were  
6 met by 162 (14.1%). Twenty-seven (2.4%) reports did not meet any quality criteria.  
7  
8 The proportion of ultrasound reports meeting each individual quality criterion is  
9 depicted in Figure 1.  
10  
11  
12  
13  
14  
15  
16  
17

18 An adjusted generalized linear mixed model including 1128 patients was used to  
19 examine the association of patient and institutional characteristics with receiving an  
20 ultrasound that met all 5 quality standards. There were no patient characteristics that  
21 were associated with having a high-quality ultrasound report. However, compared to  
22 patients from Central Ontario (referent group) those from Québec (OR 0.20; 95% CI  
23 0.06–0.66) were less likely to have a high-quality report. Patients from study sites in  
24 more populated cities ( $\geq 400,000$  inhabitants) were more likely to receive a high-  
25 quality ultrasound report (OR 6.15; 95% CI 2.20–17.18).  
26  
27  
28  
29  
30  
31  
32  
33  
34  
35  
36

37 After adjusting for institutional and patient characteristics (described above), the  
38 median OR across study sites was 1.66. In other words, the odds of receiving a high-  
39 quality ultrasound were 1.66 times greater if the same patient had imaging at  
40 1 random study site as opposed to another. This inter-hospital variation was not  
41 explained by patient characteristics and only partially by region and city size. The  
42 logistic regression model above explained 42% of the observed variation in quality  
43 rates and had good discrimination ( $c = 0.78$ ). Similarly, a logistic regression that did  
44 not account for variability between sites explained 38% of the variation and had only  
45 slightly lower discrimination ( $c = 0.75$ ). When 19 study sites were compared with  
46 their rates of high-quality ultrasound, there was considerable variation. There was a  
47  
48  
49  
50  
51  
52  
53  
54  
55  
56  
57  
58  
59  
60

1  
2  
3 difference ( $p < 0.0001$ ) in the quality of reporting between the 19 sites (best site had  
4 56/111 [50.5%] scans meeting all criteria v. the worst site with 0/19 [0.0%]). The  
5  
6 median rate of high-quality ultrasound report was 16.8 per 100 ultrasounds (range 0–  
7  
8 50.9). Figure 2 shows the variation in high-quality ultrasounds across sites.  
9  
10  
11

## 12 13 **Interpretation**

14  
15  
16  
17 Ultrasound is the first-line imaging modality for uterine fibroids. Our study  
18  
19 determined the situations in which MRI was utilized in clinical practice. We found  
20  
21 that after adjusting for patient demographics and clinical practice characteristics, MRI  
22  
23 was more likely to be obtained in cases of larger and more numerous fibroids. These  
24  
25 results are consistent with previously published literature demonstrating that the  
26  
27 capacity of ultrasound for accurate fibroid mapping falls short of MRI in large  
28  
29 (> 375 mL) multi-fibroid (> 4) uteri.<sup>2</sup> Due to the cost differential between these  
30  
31 imaging modalities, standardized algorithms that incorporate the cost-effectiveness of  
32  
33 each modality would be helpful to guide clinicians in their decision to order MRI.  
34  
35  
36

37  
38 We identified significant limitations in the quality and variability of ultrasound  
39  
40 reporting in Canada. In this prospective cohort of 1148 women who underwent an  
41  
42 ultrasound evaluation for uterine fibroids, only 23% of ultrasound reports met all  
43  
44 quality criteria, as recommended by the MUSA guidelines. Furthermore, there was  
45  
46 considerable inter-site variation in the quality of ultrasound reports, which was not  
47  
48 explained by patient characteristics and only partially by region and city size. It is  
49  
50 sobering that the odds of a Canadian woman with uterine fibroids receiving a high-  
51  
52 quality ultrasound were 1.66 times greater if the same patient had imaging at  
53  
54  
55 1 random institution as opposed to another. These findings are reflective of the  
56  
57 limited focus on the importance of standardized imaging for the evaluation of uterine  
58  
59  
60

1  
2  
3 fibroids within our clinical practice guidelines.<sup>10,11</sup> In fact, much of the focus of  
4 international guidelines on uterine fibroids is on providing guidance on management  
5 rather than thorough evaluation of the condition.<sup>10-12</sup> However, accurate diagnosis  
6 and assessment of uterine fibroids is essential to guide optimal selection of treatment  
7 strategies, particularly since fibroid characteristics are unique between patients. We  
8 observed that fibroid number, type and location were more consistently reported  
9 accurately than uterine or fibroid size.

10  
11 It is important to mention that the MUSA guidelines were established by a European  
12 team performing high-quality endovaginal ultrasonography,<sup>4</sup> not transabdominal  
13 ultrasonography as is mostly the case in the Canadian context. The CAPTURE  
14 database did not collect information about the route of ultrasonography that was  
15 performed and transvaginal ultrasonography is sometimes a second-line examination  
16 in many parts of the country. Currently, there are no Canadian-specific  
17 guidelines/standards for ultrasound reporting of uterine fibroids. Another underlying  
18 reason for the variability in ultrasound reporting across Canada may be a variation  
19 between provinces as to who performs the scan, where they are performed and  
20 remuneration structures. In larger cities in the province of Ontario, ultrasound  
21 technologists perform the majority of scans and prepare initial reports with  
22 accompanying measurements on saved images. The use of ultrasound technologists  
23 differs across the country, but they are least utilized in Québec and in smaller centers,  
24 where the physician will often directly perform and report on the ultrasound.  
25 Furthermore, there are differences in the specialty/training of physicians who can  
26 perform and interpret ultrasound. In certain provinces it is exclusively the domain of  
27 radiology, while in other regions gynecologists may also be involved. These  
28  
29  
30  
31  
32  
33  
34  
35  
36  
37  
38  
39  
40  
41  
42  
43  
44  
45  
46  
47  
48  
49  
50  
51  
52  
53  
54  
55  
56  
57  
58  
59  
60

1  
2  
3 differences in the practitioners involved in obtaining and reporting imaging may be  
4 driving the variability in quality across the country.  
5  
6  
7

### 8 9 **Limitations**

10  
11  
12 The findings of our study must be interpreted within the context of study design. One  
13 of the challenges of using data from a non-interventional registry is that data may be  
14 available in a heterogeneous manner based on local practice patterns. Unfortunately,  
15 the registry did not collect data on imaging characteristics such as route of ultrasound  
16 (transabdominal or transvaginal), the specialty of the reporting physician (radiologist  
17 or gynecologist) and whether a technologist was involved in obtaining the images. It  
18 would be important to evaluate these variables in detail in future projects and before  
19 initiating quality-improvement initiatives. The training received by gynecologists or  
20 radiologists who are performing sonographic imaging of uterine fibroids should also  
21 be evaluated and standardized in accordance with unified international guidelines.<sup>13,14</sup>  
22  
23  
24  
25  
26  
27  
28  
29  
30  
31  
32  
33  
34  
35

### 36 37 **Conclusion**

38  
39 Our findings hold important implications for the evaluation and treatment of women  
40 with uterine fibroids, a condition that affects up to 80% of women of reproductive  
41 age.<sup>1</sup> The results also shed light on optimizing resource allocation in the evaluation of  
42 this common gynecologic condition. Characteristics defined through high-quality  
43 imaging and standardized reporting may guide selection of medical versus surgical  
44 management of fibroids. Furthermore, if surgical management is chosen, accurate  
45 evaluation of fibroid topography will have implications for surgical planning (route,  
46 time, incision, etc) and patient counselling. As this is the first study to evaluate the  
47 uptake of MUSA guidelines and quality of imaging in uterine fibroids, we propose  
48 that prompt evaluation of factors influencing imaging quality are necessary. Factors  
49  
50  
51  
52  
53  
54  
55  
56  
57  
58  
59  
60

1  
2  
3 limiting quality of ultrasound reporting may include lack of knowledge, dissemination  
4 of imaging practice guidelines, limited training and time/resource restraints, as well as  
5 patient characteristics (i.e., elevated BMI). Identifying such limitations can focus  
6 areas of improvement. Furthermore, we suggest that national clinical practice  
7 guidelines for uterine fibroids should include guidance on choice of imaging modality  
8 and identify standards with respect to imaging quality for fibroid evaluation.  
9  
10  
11  
12  
13  
14  
15  
16  
17  
18  
19  
20  
21  
22  
23  
24  
25  
26  
27  
28  
29  
30  
31  
32  
33  
34  
35  
36  
37  
38  
39  
40  
41  
42  
43  
44  
45  
46  
47  
48  
49  
50  
51  
52  
53  
54  
55  
56  
57  
58  
59  
60

Confidential

## References

1. Baird DD, Dunson DB, Hill MC, et al. High cumulative incidence of uterine leiomyoma in black and white women: ultrasound evidence. *Am J Obstet Gynecol* 2003;188:100–7.
2. Dueholm M, Lundorf E, Hansen ES, et al. Accuracy of magnetic resonance imaging and transvaginal ultrasonography in the diagnosis, mapping, and measurement of uterine myomas. *Am J Obstet Gynecol* 2002;186:409–15.
3. Marret H, Fritel X, Ouldamer L, et al. Therapeutic management of uterine fibroid tumors: updated French guidelines. *Eur J Obstet Gynecol Reprod Biol* 2012;165:156–64.
4. Van den Bosch T, Dueholm M, Leone FPG, et al. Terms, definitions and measurements to describe sonographic features of myometrium and uterine masses: a consensus opinion from the Morphological Uterus Sonographic Assessment (MUSA) group. *Ultrasound Obstet Gynecol* 2015;46:284–98.
5. Bedaiwy MA, Janiszewski P, Singh SS, et al. A patient registry for the management of uterine fibroids in Canada: protocol for a multicenter, prospective, noninterventional study. *JMIR Res Protoc* 2018;7:e10926.
6. Coyne KS, Margolis MK, Bradley LD, et al. Further validation of the uterine fibroid symptom and quality-of-life questionnaire. *Value Health* 2012;15:135–42.

- 1  
2  
3 7. Spies JB, Coyne K, Guaou Guaou N, et al. The UFS-QOL, a new disease-  
4  
5 specific symptom and health-related quality of life questionnaire for  
6  
7 leiomyomata. *Obstet Gynecol* 2002;99:290–300.  
8  
9
- 10  
11 8. Ruta DA, Garratt AM, Chadha YC, et al. Assessment of patients with  
12  
13 menorrhagia: how valid is a structured clinical history as a measure of health  
14  
15 status? *Qual Life Res* 1995;4:33–40.  
16  
17
- 18  
19 9. Larsen K, Merlo J. Appropriate assessment of neighborhood effects on  
20  
21 individual health: integrating random and fixed effects in multilevel logistic  
22  
23 regression. *Am J Epidemiol* 2005;161:81–8.  
24  
25
- 26  
27 10. Vilos GA, Allaire C, Laberge PY, et al. The management of uterine  
28  
29 leiomyomas. *J Obstet Gynaecol Can* 2015;37:157–78.  
30  
31
- 32  
33 11. Pérez-López FR, Ornat L, Ceausu I, et al. EMAS position statement:  
34  
35 management of uterine fibroids. *Maturitas* 2014;79:106–16.  
36  
37
- 38  
39 12. Agency for Healthcare Research and Quality. Comparative Effectiveness  
40  
41 Review Number 195. Management of Uterine Fibroids. 2017. Available:  
42  
43 [https://effectivehealthcare.ahrq.gov/sites/default/files/pdf/cer-195-uterine-](https://effectivehealthcare.ahrq.gov/sites/default/files/pdf/cer-195-uterine-fibroids-final_0.pdf)  
44  
45 [fibroids-final\\_0.pdf](https://effectivehealthcare.ahrq.gov/sites/default/files/pdf/cer-195-uterine-fibroids-final_0.pdf) (accessed 2018 Dec. 19).  
46  
47
- 48  
49 13. Leonardi M, Murji A, D'Souza R. Ultrasound curricula in obstetrics and  
50  
51 gynecology training programs. *Ultrasound Obstet Gynecol* 2018;52:147–50.  
52  
53
- 54  
55 14. Abuhamad A, Minton KK, Benson CB, et al. Obstetric and gynecologic  
56  
57 ultrasound curriculum and competency assessment in residency training  
58  
59 programs: consensus report. *Am J Obstet Gynecol* 2018;218:29–67.  
60



1  
2  
3  
4  
5  
6  
7 **Contributors:** All authors contributed to the conception/design of the work.

8  
9 Dr. Lebovic performed the data analysis for this study. Drs. Bougie, Murji and  
10  
11 Bedaiwy interpreted the data from the analysis. All authors were involved in drafting  
12  
13 the manuscript and in the critical revisions for intellectual content, and all authors  
14  
15 read and approved the final manuscript. All authors agree to be accountable for all  
16  
17 aspects of the work.  
18  
19

20  
21 **Acknowledgments:** The authors greatly acknowledge the following members of the  
22  
23 CAPTURE Steering Committee: Dr. Sari Kives, Dr. George Vilos, Dr. Joshua Polsky  
24  
25 and Dr. Liane Belland. This manuscript was reviewed by the CAPTURE Steering  
26  
27 Committee, which also contributed to the development of the study goals.  
28  
29  
30  
31  
32  
33  
34  
35  
36  
37  
38  
39  
40  
41  
42  
43  
44  
45  
46  
47  
48  
49  
50  
51  
52  
53  
54  
55  
56  
57  
58  
59  
60

**Table 1: Demographics based on imaging modality**

|                                                               | Ultrasound<br>( <i>n</i> = 1148) | MRI<br>( <i>n</i> = 135) | <i>p</i> value |
|---------------------------------------------------------------|----------------------------------|--------------------------|----------------|
| Mean (SD) age, years                                          | 43.22 (6.69)                     | 40.24 (7.30)             | < <b>0.001</b> |
| Mean (SD) BMI                                                 | 27.28 (6.29)                     | 27.20 (7.04)             | 0.891          |
| Nulliparous, <i>n</i> (%)                                     | 483 (42.1)                       | 91 (67.4)                | < <b>0.001</b> |
| Nulligravid, <i>n</i> (%)                                     | 358 (31.2)                       | 61 (45.2)                | <b>0.001</b>   |
| Family history of fibroids, <i>n</i> (%)                      | 401 (34.9)                       | 46 (34.1)                | 0.072          |
| Previous procedural intervention<br>for fibroid, <i>n</i> (%) | 251 (21.9)                       | 29 (21.5)                | 0.883          |
| History of bulk symptoms, <i>n</i> (%)                        | 663 (57.8)                       | 90 (66.7)                | 0.116          |
| Mean (SD) maximum fibroid<br>diameter, mm                     | 75.56 (36.01)                    | 90.15 (34.67)            | < <b>0.001</b> |
| Number of fibroids, <i>n</i> (%)                              |                                  |                          | < <b>0.001</b> |
| 1                                                             | 408 (35.5)                       | 35 (25.9)                |                |
| 2                                                             | 191 (16.6)                       | 20 (14.8)                |                |
| 3                                                             | 135 (11.8)                       | 6 (4.4)                  |                |
| 4                                                             | 45 (3.9)                         | 5 (3.7)                  |                |
| > 4                                                           | 101 (8.8)                        | 17 (12.6)                |                |
| Multiple/not specified                                        | 268 (23.3)                       | 52 (38.5)                |                |
| Mean (SD) UFS-QOL score                                       | 50.25 (23.41)                    | 46.45 (22.77)            | 0.076          |
| Mean (SD) HRQoL score                                         | 50.45 (25.23)                    | 52.05 (26.39)            | 0.493          |

|                               |               |               |              |
|-------------------------------|---------------|---------------|--------------|
| Mean (SD) AMSS score          | 37.07 (18.89) | 31.85 (20.74) | <b>0.003</b> |
| Academic center, <i>n</i> (%) | 622 (54.2)    | 84 (62.2)     | 0.092        |
| Region, <i>n</i> (%)          |               |               | 0.076        |
| Western Ontario               | 160 (14.1)    | 16 (12.1)     |              |
| Eastern Ontario               | 131 (11.5)    | 24 (18.2)     |              |
| Central Ontario               | 264 (23.3)    | 29 (22.0)     |              |
| Québec                        | 267 (23.5)    | 21 (15.9)     |              |
| Western Canada                | 313 (27.6)    | 42 (31.8)     |              |
| Small city size, <i>n</i> (%) | 437 (38.1)    | 41 (30.4)     | 0.098        |

Note: SD = standard deviation; UFS-QOL = Uterine Fibroid Symptom and Health-Related Quality of Life questionnaire; HRQoL = health-related quality of life; AMSS = Aberdeen Menorrhagia Severity Scale.

**Table 2: Quality of ultrasound reports**

| Quality criterion, <i>n</i> (%)            | Patients           |
|--------------------------------------------|--------------------|
|                                            | ( <i>n</i> = 1148) |
| <b>Fibroid number</b>                      |                    |
| Meets standard                             | 880 (76.7)         |
| <b>Fibroid dimensions</b>                  |                    |
| Meets standard                             | 667 (58.1)         |
| 2 dimensions reported                      | 179 (15.6)         |
| 1 dimension reported                       | 275 (24.0)         |
| 0 dimensions reported                      | 27 (2.4)           |
| <b>Uterine dimensions</b>                  |                    |
| Meets standard                             | 504 (43.9)         |
| 2 dimensions reported                      | 3 (0.3)            |
| 1 dimension reported                       | 5 (0.4)            |
| 0 dimensions reported                      | 636 (55.4)         |
| <b>Fibroid type</b>                        |                    |
| Meets standard                             | 1120 (97.6)        |
| <b>Fibroid location</b>                    |                    |
| Meets standard                             | 907 (79.0)         |
| <b>5 criteria meeting quality standard</b> | <b>268 (23.3)</b>  |

## Figure legends

**Figure 1:** Distribution of ultrasound reports meeting each quality criterion.

**Figure 2:** Site-specific rates (in ascending order) of high-quality ultrasound reporting (per 100 ultrasounds).

Confidential

1  
2  
3  
4  
5  
6  
7  
8  
9  
10  
11  
12  
13  
14  
15  
16  
17  
18  
19  
20  
21  
22  
23  
24  
25  
26  
27  
28  
29  
30  
31  
32  
33  
34  
35  
36  
37  
38  
39  
40  
41  
42  
43  
44  
45  
46  
47  
48  
49  
50  
51  
52  
53  
54  
55  
56  
57  
58  
59  
60

Figure 1

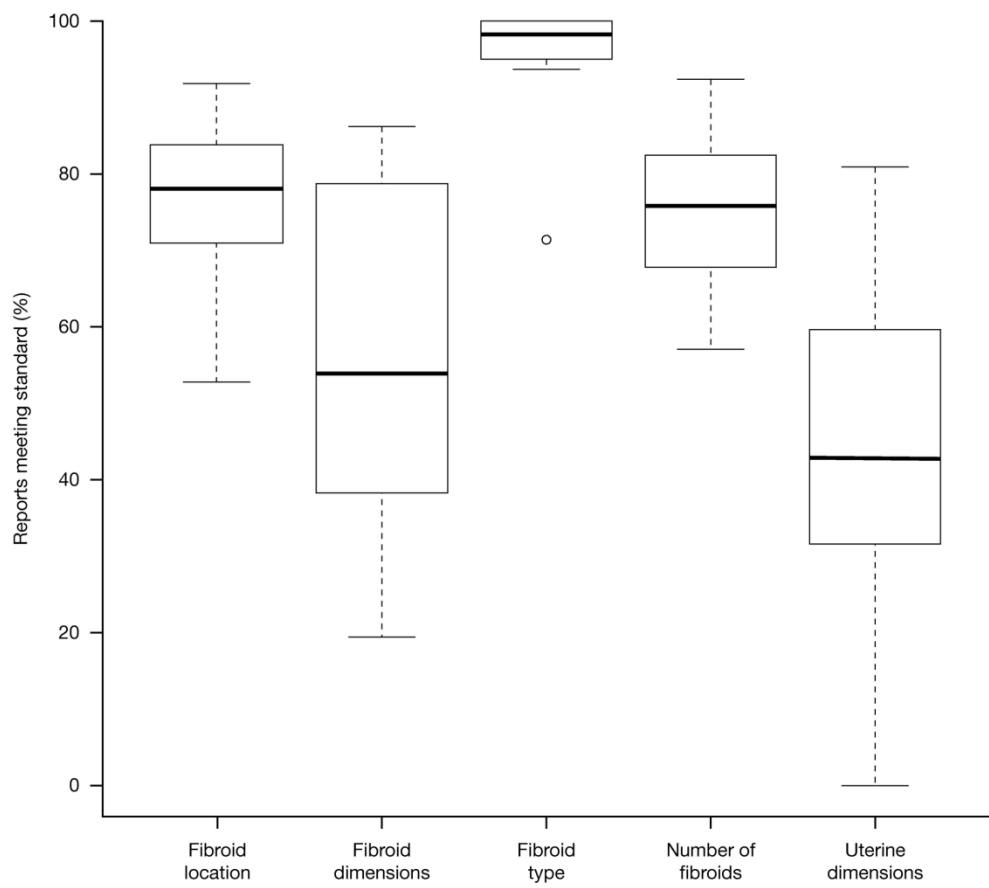

Figure 1: Distribution of ultrasound reports meeting each quality criterion.

187x194mm (300 x 300 DPI)

1  
2  
3  
4  
5  
6  
7  
8  
9  
10  
11  
12  
13  
14  
15  
16  
17  
18  
19  
20  
21  
22  
23  
24  
25  
26  
27  
28  
29  
30  
31  
32  
33  
34  
35  
36  
37  
38  
39  
40  
41  
42  
43  
44  
45  
46  
47  
48  
49  
50  
51  
52  
53  
54  
55  
56  
57  
58  
59  
60

Figure 2

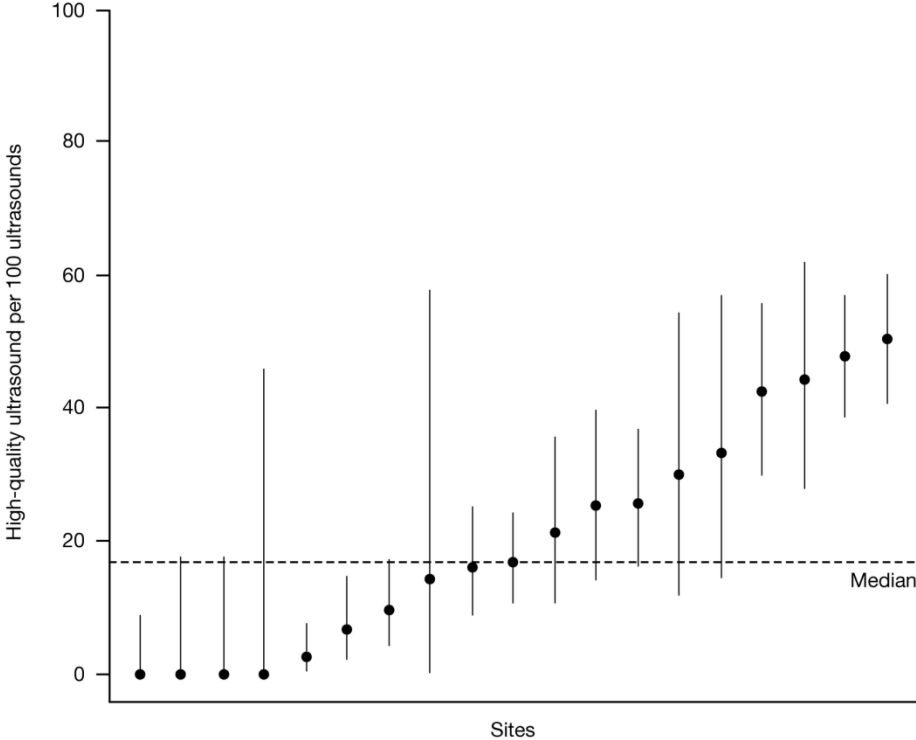

Figure 2: Site-specific rates (in ascending order) of high-quality ultrasound reporting (per 100 ultrasounds).

174x147mm (300 x 300 DPI)

**Supplementary material**

**Table S1: Listing of the site names, research ethics board names and registration numbers for the 19 CAPTURE registry study sites across Canada**

| <b>Site name</b>                                                                      | <b>Research ethics board name</b>              | <b>Registration number</b> |
|---------------------------------------------------------------------------------------|------------------------------------------------|----------------------------|
| Capital City Women’s Center, Edmonton, Alberta                                        | Health Research Ethics Board – Health Panel    | Pro00063537                |
| Centre Gynecologie et Maternité, LaSalle, Québec                                      | IRB Institutional Review Board Services        | Pro00012844                |
| CHU de Québec, Université Laval, Québec City                                          | Comité d’éthique de la recherche CHU de Québec | R-00-768                   |
| Clinique de Gynécologie & Obstétrique Pierre Boucher,<br>Longueuil, Québec            | IRB Institutional Review Board Services        | Pro00012844                |
| Complexe Medical Saint Laurant – Dr. Robert Sabbah<br>Inc., Saint-Laurent, Québec     | IRB Institutional Review Board Services        | Pro00012844                |
| Department of Obstetrics and Gynaecology, St.<br>Michael’s Hospital, Toronto, Ontario | St. Michael’s Hospital Research Ethics Office  | 15-286                     |

1  
2  
3  
4  
5  
6  
7  
8  
9  
10  
11  
12  
13  
14  
15  
16  
17  
18  
19  
20  
21  
22  
23  
24  
25  
26  
27  
28  
29  
30  
31  
32  
33  
34  
35  
36  
37  
38  
39  
40  
41  
42  
43  
44  
45  
46



|    |                                                      |                                                 |              |
|----|------------------------------------------------------|-------------------------------------------------|--------------|
| 1  |                                                      |                                                 |              |
| 2  |                                                      |                                                 |              |
| 3  |                                                      |                                                 |              |
| 4  | Department of Obstetrics and Gynecology, BC          | University of British Columbia Children's and   | H15-03372    |
| 5  |                                                      |                                                 |              |
| 6  | Women's Hospital & Health Centre, Vancouver, British | Women's Research Ethics Board                   |              |
| 7  |                                                      |                                                 |              |
| 8  | Columbia                                             |                                                 |              |
| 9  |                                                      |                                                 |              |
| 10 |                                                      |                                                 |              |
| 11 | Department of Obstetrics and Gynecology, Mount Sinai | Mount Sinai Hospital Research Ethics Board      | 15-0206-E    |
| 12 |                                                      |                                                 |              |
| 13 | Hospital, Toronto, Ontario                           |                                                 |              |
| 14 |                                                      |                                                 |              |
| 15 |                                                      |                                                 |              |
| 16 | Dr. Barry Sanders, Inc., Vancouver, British Columbia | IRB Institutional Review Board Services         | Pro00012844  |
| 17 |                                                      |                                                 |              |
| 18 |                                                      |                                                 |              |
| 19 | Hamilton Health Sciences, Hamilton, Ontario          | Hamilton Integrated Research Ethics Board       | 0620         |
| 20 |                                                      |                                                 |              |
| 21 |                                                      |                                                 |              |
| 22 | IWK Health Centre, Halifax, Nova Scotia              | IWK Research Ethics Board (IWK-REB)             | 1021698      |
| 23 |                                                      |                                                 |              |
| 24 |                                                      |                                                 |              |
| 25 | Kingston General Hospital, Kingston, Ontario         | Queen's University Health Sciences & Affiliated | 6021528      |
| 26 |                                                      |                                                 |              |
| 27 |                                                      | Teaching Hospitals Research Ethics Board        |              |
| 28 |                                                      |                                                 |              |
| 29 |                                                      | (HSREB)                                         |              |
| 30 |                                                      |                                                 |              |
| 31 |                                                      |                                                 |              |
| 32 | Ottawa Hospital Research Institute, Ottawa, Ontario  | Ottawa Health Science Network Research Ethics   | 20150671-01H |
| 33 |                                                      |                                                 |              |
| 34 |                                                      | Board                                           |              |
| 35 |                                                      |                                                 |              |
| 36 |                                                      |                                                 |              |
| 37 |                                                      |                                                 |              |
| 38 |                                                      |                                                 |              |
| 39 |                                                      |                                                 |              |
| 40 |                                                      |                                                 |              |
| 41 |                                                      |                                                 |              |
| 42 |                                                      |                                                 |              |
| 43 |                                                      |                                                 |              |
| 44 |                                                      |                                                 |              |
| 45 |                                                      |                                                 |              |
| 46 |                                                      |                                                 |              |

|    |                                                       |                                                   |                |
|----|-------------------------------------------------------|---------------------------------------------------|----------------|
| 1  |                                                       |                                                   |                |
| 2  |                                                       |                                                   |                |
| 3  |                                                       |                                                   |                |
| 4  | Regina Medical Centre, Regina, Saskatchewan           | University of Saskatchewan Research Ethics Office | Bio 16-87 /    |
| 5  |                                                       |                                                   |                |
| 6  |                                                       |                                                   | RQHR 16-26     |
| 7  |                                                       |                                                   |                |
| 8  | Southern Health Centre, White Rock, British Columbia  | IRB Institutional Review Board Services           | Pro00012844    |
| 9  |                                                       |                                                   |                |
| 10 |                                                       |                                                   |                |
| 11 | South Windsor Women’s Health, Windsor, Ontario        | IRB Institutional Review Board Services           | Pro00012844    |
| 12 |                                                       |                                                   |                |
| 13 |                                                       |                                                   |                |
| 14 | Strand Clinic, St. John’s, Newfoundland               | Newfoundland and Labrador Health Research         | File# 20170665 |
| 15 |                                                       |                                                   |                |
| 16 |                                                       | Ethics Board                                      | Ref# 2016.228  |
| 17 |                                                       |                                                   |                |
| 18 |                                                       |                                                   |                |
| 19 | The Fertility Clinic, Victoria Hospital London Health | IRB Institutional Review Board Services           | Pro00012844    |
| 20 |                                                       |                                                   |                |
| 21 | Sciences Centre, London, Ontario                      |                                                   |                |
| 22 |                                                       |                                                   |                |
| 23 |                                                       |                                                   |                |
| 24 | University of Calgary, Calgary, Alberta               | Conjoint Health Research Ethics Board             | REB 16-0547    |
| 25 |                                                       |                                                   |                |
| 26 |                                                       |                                                   |                |
| 27 |                                                       |                                                   |                |
| 28 |                                                       |                                                   |                |
| 29 |                                                       |                                                   |                |
| 30 |                                                       |                                                   |                |
| 31 |                                                       |                                                   |                |
| 32 |                                                       |                                                   |                |
| 33 |                                                       |                                                   |                |
| 34 |                                                       |                                                   |                |
| 35 |                                                       |                                                   |                |
| 36 |                                                       |                                                   |                |
| 37 |                                                       |                                                   |                |
| 38 |                                                       |                                                   |                |
| 39 |                                                       |                                                   |                |
| 40 |                                                       |                                                   |                |
| 41 |                                                       |                                                   |                |
| 42 |                                                       |                                                   |                |
| 43 |                                                       |                                                   |                |
| 44 |                                                       |                                                   |                |
| 45 |                                                       |                                                   |                |
| 46 |                                                       |                                                   |                |

STROBE Statement—Checklist of items that should be included in reports of *cohort studies*

|                           | Item No | Recommendation                                                                                                                                                                                    | Page No                                         |
|---------------------------|---------|---------------------------------------------------------------------------------------------------------------------------------------------------------------------------------------------------|-------------------------------------------------|
| <b>Title and abstract</b> | 1       | (a) Indicate the study's design with a commonly used term in the title or the abstract                                                                                                            | 1                                               |
|                           |         | (b) Provide in the abstract an informative and balanced summary of what was done and what was found                                                                                               | 3                                               |
| <b>Introduction</b>       |         |                                                                                                                                                                                                   |                                                 |
| Background/rationale      | 2       | Explain the scientific background and rationale for the investigation being reported                                                                                                              | 5-6                                             |
| Objectives                | 3       | State specific objectives, including any prespecified hypotheses                                                                                                                                  | 6                                               |
| <b>Methods</b>            |         |                                                                                                                                                                                                   |                                                 |
| Study design              | 4       | Present key elements of study design early in the paper                                                                                                                                           | 6-8                                             |
| Setting                   | 5       | Describe the setting, locations, and relevant dates, including periods of recruitment, exposure, follow-up, and data collection                                                                   | 6 (reference to previous publication); Table S1 |
| Participants              | 6       | (a) Give the eligibility criteria, and the sources and methods of selection of participants. Describe methods of follow-up                                                                        | 6                                               |
|                           |         | (b) For matched studies, give matching criteria and number of exposed and unexposed                                                                                                               | N/A                                             |
| Variables                 | 7       | Clearly define all outcomes, exposures, predictors, potential confounders, and effect modifiers. Give diagnostic criteria, if applicable                                                          | 6-9                                             |
| Data sources/measurement  | 8*      | For each variable of interest, give sources of data and details of methods of assessment (measurement). Describe comparability of assessment methods if there is more than one group              | 6-9                                             |
| Bias                      | 9       | Describe any efforts to address potential sources of bias                                                                                                                                         | 8-9                                             |
| Study size                | 10      | Explain how the study size was arrived at                                                                                                                                                         | N/A                                             |
| Quantitative variables    | 11      | Explain how quantitative variables were handled in the analyses. If applicable, describe which groupings were chosen and why                                                                      | 7-8                                             |
| Statistical methods       | 12      | (a) Describe all statistical methods, including those used to control for confounding                                                                                                             | 8-9                                             |
|                           |         | (b) Describe any methods used to examine subgroups and interactions                                                                                                                               |                                                 |
|                           |         | (c) Explain how missing data were addressed                                                                                                                                                       |                                                 |
|                           |         | (d) If applicable, explain how loss to follow-up was addressed                                                                                                                                    |                                                 |
|                           |         | (e) Describe any sensitivity analyses                                                                                                                                                             |                                                 |
| <b>Results</b>            |         |                                                                                                                                                                                                   |                                                 |
| Participants              | 13*     | (a) Report numbers of individuals at each stage of study—eg numbers potentially eligible, examined for eligibility, confirmed eligible, included in the study, completing follow-up, and analysed | 9                                               |
|                           |         | (b) Give reasons for non-participation at each stage                                                                                                                                              |                                                 |
|                           |         | (c) Consider use of a flow diagram                                                                                                                                                                |                                                 |
| Descriptive data          | 14*     | (a) Give characteristics of study participants (eg demographic, clinical, social) and information on exposures and potential confounders                                                          | 18-19 (Table 1)                                 |
|                           |         | (b) Indicate number of participants with missing data for each variable of interest                                                                                                               |                                                 |
|                           |         | (c) Summarise follow-up time (eg, average and total amount)                                                                                                                                       |                                                 |
| Outcome data              | 15*     | Report numbers of outcome events or summary measures over time                                                                                                                                    | NA                                              |

|    |                          |    |                                                                                                                                                                                                              |                                   |
|----|--------------------------|----|--------------------------------------------------------------------------------------------------------------------------------------------------------------------------------------------------------------|-----------------------------------|
| 1  | Main results             | 16 | (a) Give unadjusted estimates and, if applicable, confounder-adjusted estimates and their precision (eg, 95% confidence interval). Make clear which confounders were adjusted for and why they were included | 9-11, Table 2, Figure 1, Figure 2 |
| 2  |                          |    | (b) Report category boundaries when continuous variables were categorized                                                                                                                                    |                                   |
| 3  |                          |    | (c) If relevant, consider translating estimates of relative risk into absolute risk for a meaningful time period                                                                                             |                                   |
| 4  | Other analyses           | 17 | Report other analyses done—eg analyses of subgroups and interactions, and sensitivity analyses                                                                                                               | NA                                |
| 5  | <b>Discussion</b>        |    |                                                                                                                                                                                                              |                                   |
| 6  | Key results              | 18 | Summarise key results with reference to study objectives                                                                                                                                                     | 11                                |
| 7  | Limitations              | 19 | Discuss limitations of the study, taking into account sources of potential bias or imprecision. Discuss both direction and magnitude of any potential bias                                                   | 13                                |
| 8  | Interpretation           | 20 | Give a cautious overall interpretation of results considering objectives, limitations, multiplicity of analyses, results from similar studies, and other relevant evidence                                   | 11-14                             |
| 9  | Generalisability         | 21 | Discuss the generalisability (external validity) of the study results                                                                                                                                        | 11-14                             |
| 10 | <b>Other information</b> |    |                                                                                                                                                                                                              |                                   |
| 11 | Funding                  | 22 | Give the source of funding and the role of the funders for the present study and, if applicable, for the original study on which the present article is based                                                | 1                                 |

\*Give information separately for exposed and unexposed groups.

**Note:** An Explanation and Elaboration article discusses each checklist item and gives methodological background and published examples of transparent reporting. The STROBE checklist is best used in conjunction with this article (freely available on the Web sites of PLoS Medicine at <http://www.plosmedicine.org/>, Annals of Internal Medicine at <http://www.annals.org/>, and Epidemiology at <http://www.epidem.com/>). Information on the STROBE Initiative is available at <http://www.strobe-statement.org>.
